# Supplementary material for: Characterization of a Portable, Light-Weight, Low-Power Chemical Ionization Time-of-Flight Mass Spectrometer
Source: Copernicus journal article supplement (doi:10.5194/egusphere-2025-5685), 2026-01-09
Supplement: Supplementary file 1 [file egusphere-2025-5685-supplement.pdf]

# Characterization of a Portable, Light-Weight, Low-Power Chemical Ionization Time-of-Flight Mass Spectrometer

Austin D. Dobreceвич<sup>1,2</sup>, Felipe Hilfiker-Lopez<sup>3</sup>, Urs Rohner<sup>3</sup>, Joel A. Thornton<sup>2</sup>

<sup>1</sup>Department of Chemistry, University of Washington, Seattle, 98195, USA

<sup>2</sup>Department of Atmospheric and Climate Science, University of Washington, Seattle, 98195, USA

<sup>3</sup>Tofwerk AG, Thun, postal code 3645, Switzerland

Correspondence to: Joel A. Thornton (joelt@uw.edu)

## Supplementary Info.

Table S1: 13-Component VOC mixture in nitrogen

| Standard (ppb)         | Compound CAS# | Concentration |
|------------------------|---------------|---------------|
| Methanol               | 67-56-1       | 1000          |
| Acetonitrile           | 70-05-8       | 1000          |
| Acetaldehyde           | 75-07-0       | 1000          |
| Acrylonitrile          | 107-13-1      | 1000          |
| Acetone                | 67-64-1       | 1000          |
| Isoprene               | 78-79-5       | 1000          |
| Methyl Ethyl Ketone    | 78-93-3       | 1000          |
| Benzene                | 71-43-2       | 1000          |
| Toluene                | 108-88-3      | 1000          |
| m-Xylene               | 108-38-3      | 1000          |
| 1,2,4-Trimethylbenzene | 95-63-6       | 1000          |
| $\alpha$ -Pinene       | 80-56-8       | 1000          |
| $\beta$ -Caryophyllene | 87-44-5       | 100           |

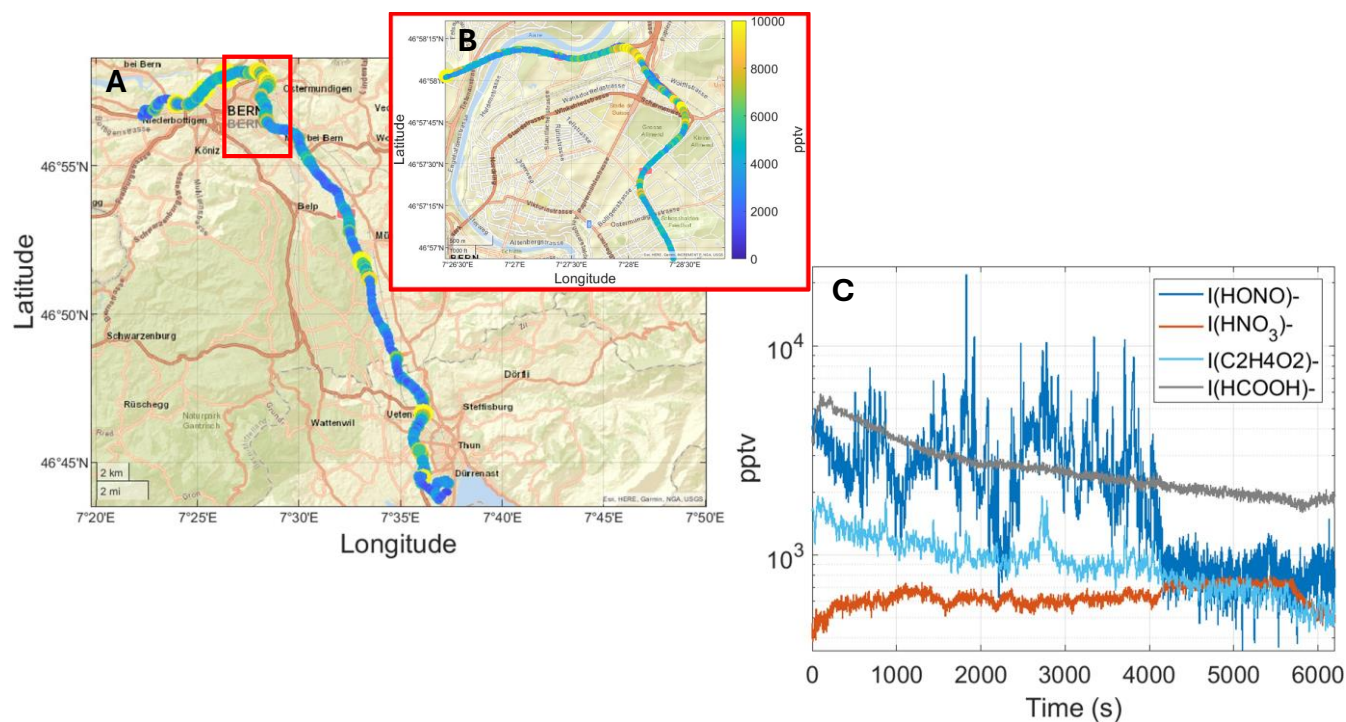

**Figure S1: (a) Mobile driving measurements of HONO using iodide chemical ionization detection. (b) Zoom in on area of higher anthropogenic activity tracing HONO. (c) Representative timeseries of different analyte traces during the driving measurements.**

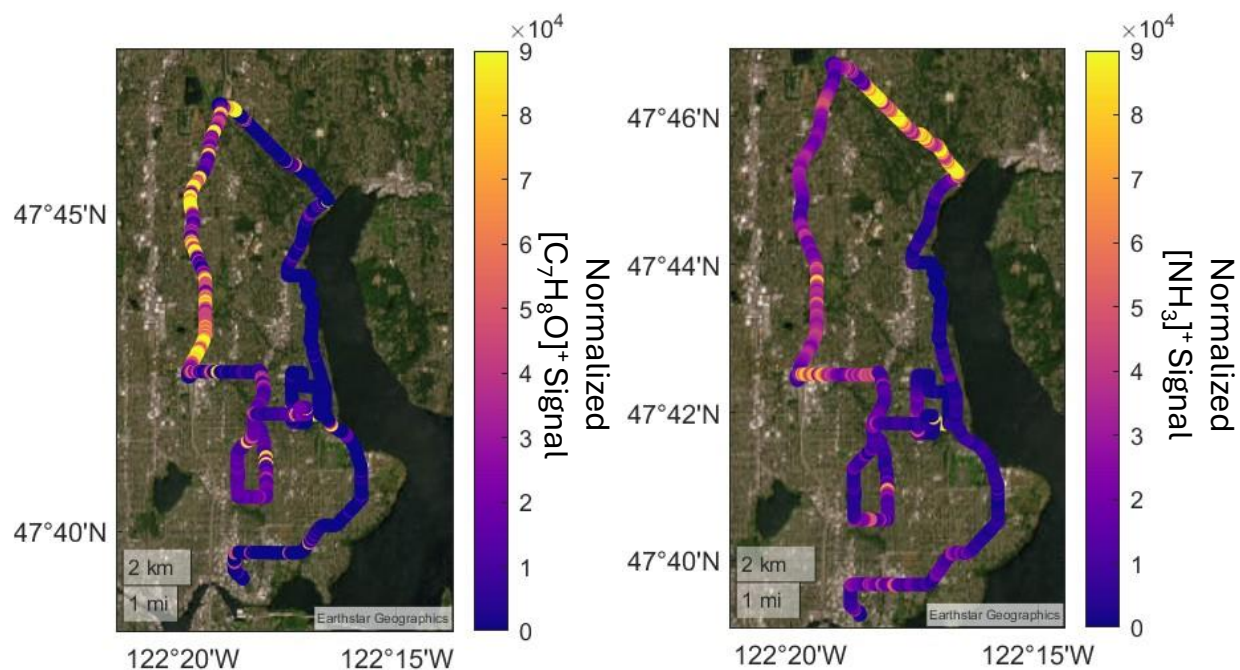

**Figure S2: (a) Mobile driving measurements of  $m/z$  consistent with  $C_7H_8O^+$ , a suspect woodsmoke tracer using benzene ion chemical ionization detection. (b) Mobile driving measurements of  $m/z$  consistent with  $[NH_3C_6H_6]^+$  the adduct of benzene with ammonia.**
